# Supplementary material
Source: Royal Society of Chemistry journal article supplement (doi:10.1039/d6tc00887a)
Supplement: d6tc00887a1.pdf [file d6tc00887a1.pdf]

## Electronic Supplementary Material

### Enhancing efficiency and tuning emission band via energy transfer of Cr<sup>3+</sup>, Ce<sup>3+</sup> co-doped CaLu<sub>2</sub>Mg<sub>2</sub>Si<sub>3</sub>O<sub>12</sub> phosphors

Ruiyang Li,<sup>ab</sup> Yongfu Liu,<sup>\*a</sup> Peng Sun,<sup>a</sup> Jianrong Qiu<sup>\*b</sup> and Jiang Jun<sup>\*a</sup>

<sup>a</sup>Ningbo Institute of Materials Technology & Engineering, Chinese Academy of Sciences, Ningbo 315201, P.R. China

<sup>b</sup>State Key Lab of Modern Optical Instrumentation, College of Optical Science and Engineering Zhejiang University, Hangzhou 310027, P.R. China

Corresponding author: liuyongfu@nimte.ac.cn (Y. Liu), qjr@zju.edu.cn (J. Qiu) and jjun@nimte.ac.cn (J. Jiang)

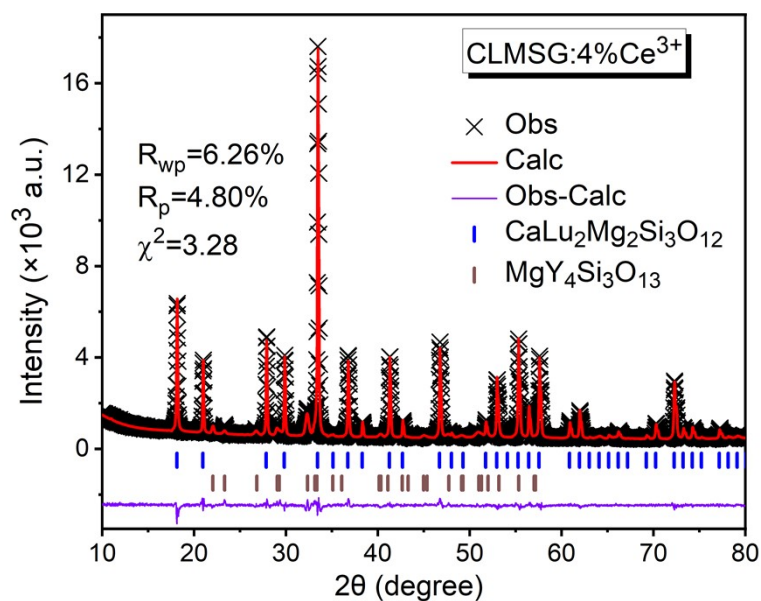

**Fig. S1** Rietveld refinement results of the XRD pattern of CLMSG:4%Ce<sup>3+</sup>.

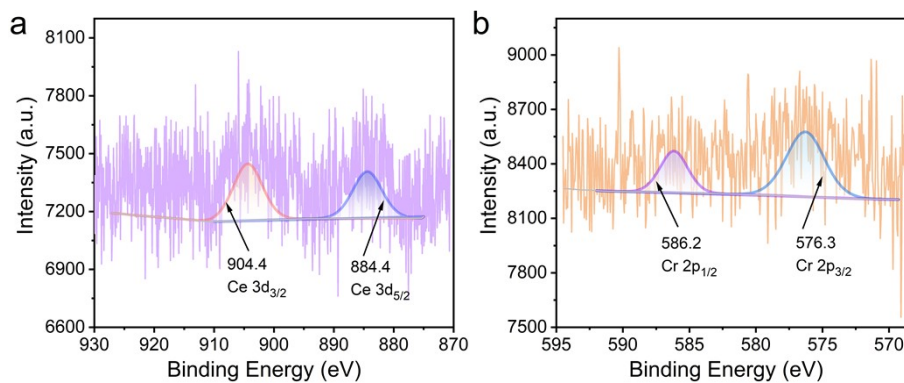

**Fig. S2** XPS spectra of CLMSG:4%Ce<sup>3+</sup>,3%Cr<sup>3+</sup> in Ce 3d and Cr 2p levels.

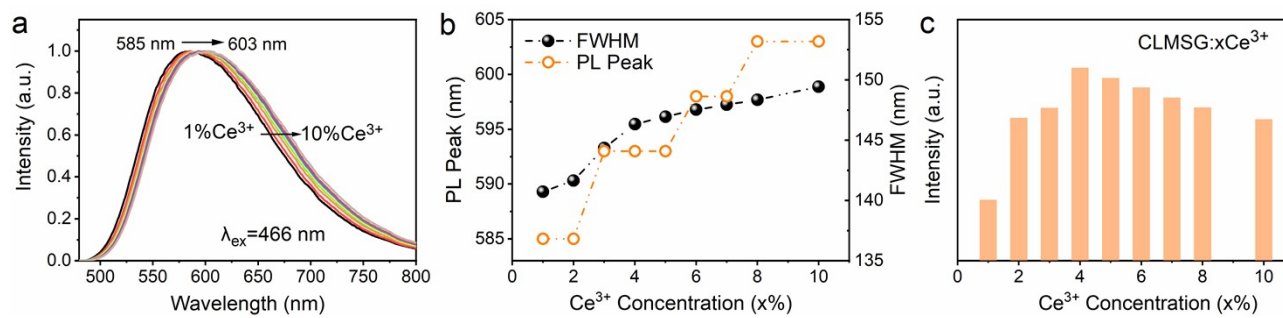

**Fig. S3** (a) Normalized PL spectra, (b) PL peak and FWHM (c) intensities of CLMSG:xCe<sup>3+</sup> ( $x = 1\% - 10\%$ ).

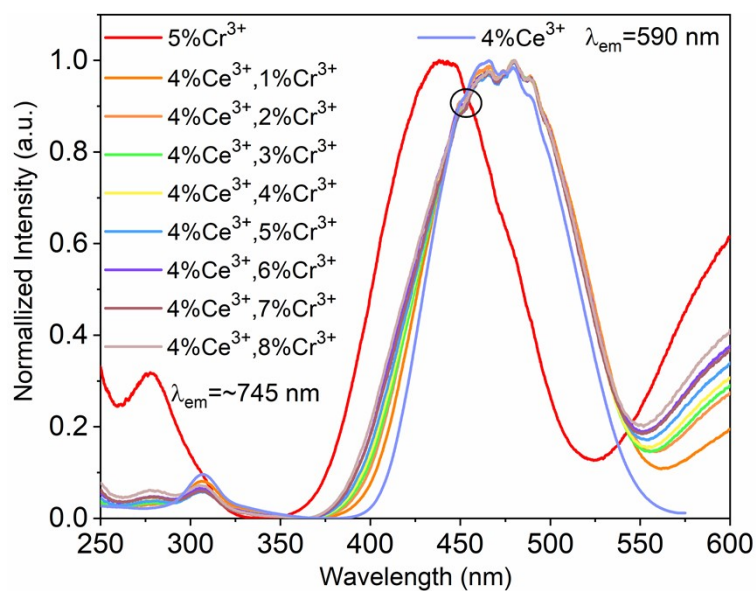

**Fig. S4** Normalized PLE spectra of CLMSG:5%Cr<sup>3+</sup> and CLMSG:4%Ce<sup>3+</sup>, yCr<sup>3+</sup> (y = 0% - 8%). The cross-point of the PLE spectra is located at approximately 457 nm.

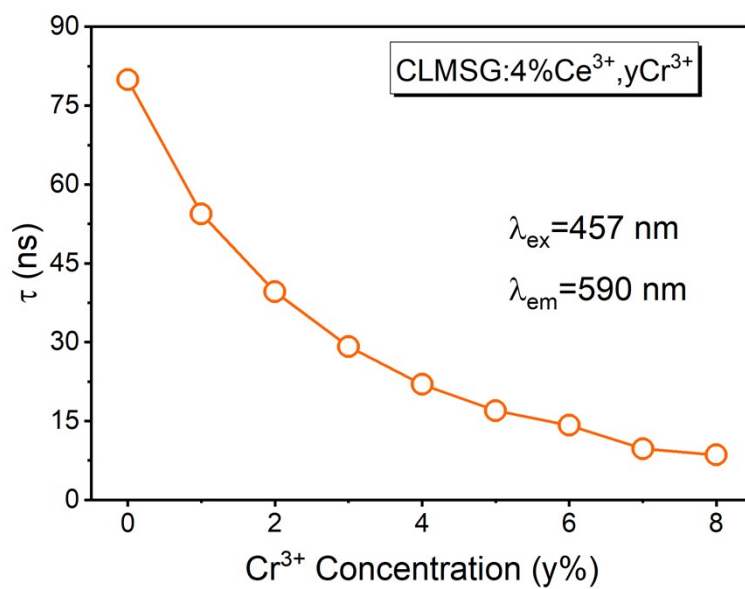

**Fig. S5** Fluorescent decay times of Ce<sup>3+</sup> monitored at 590 nm and excited at 457 nm in CLMSG:4%Ce<sup>3+</sup>, yCr<sup>3+</sup> (y = 0% - 8%) recorded at RT.  $\tau$  is the average lifetime, which gradually shortens from 79.9 to 8.5 ns when Cr<sup>3+</sup> increases from 0 to 8%.

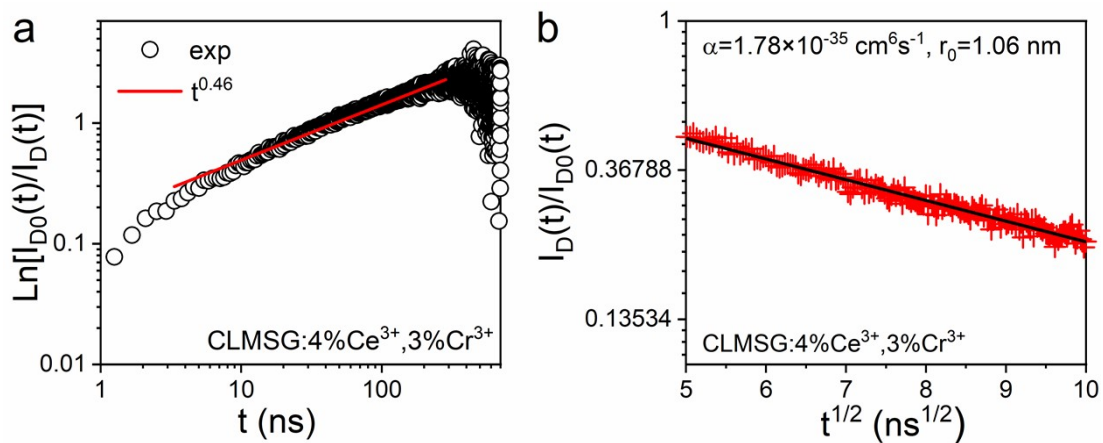

**Fig. S6** (a) Log-log plot of  $\ln[I_{D0}(t)/I_D(t)]$  vs  $t$  and (b) Plot of  $\ln[I_D(t)/I_{D0}(t)]$  vs  $t^{1/2}$  for the sample CLMSG:4%Ce<sup>3+</sup>,3%Cr<sup>3+</sup>. The solid lines indicate the fitting result.

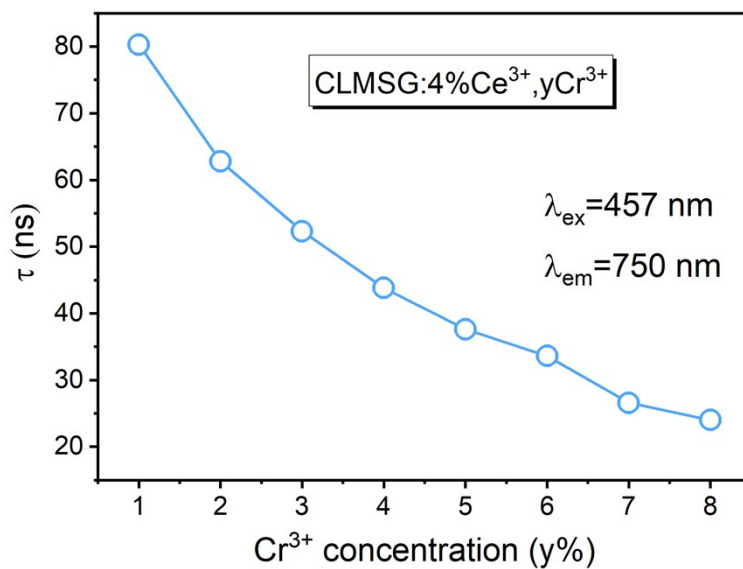

**Fig. S7** Fluorescent decay times of Cr<sup>3+</sup> monitored at 750 nm and excited at 457 nm in CLMSG:4%Ce<sup>3+</sup>, yCr<sup>3+</sup> (y = 1% - 8%) recorded at RT.  $\tau$  is the average lifetime, which gradually shortens from 80.3 to 24.0 ns when Cr<sup>3+</sup> increases from 1% to 8%.

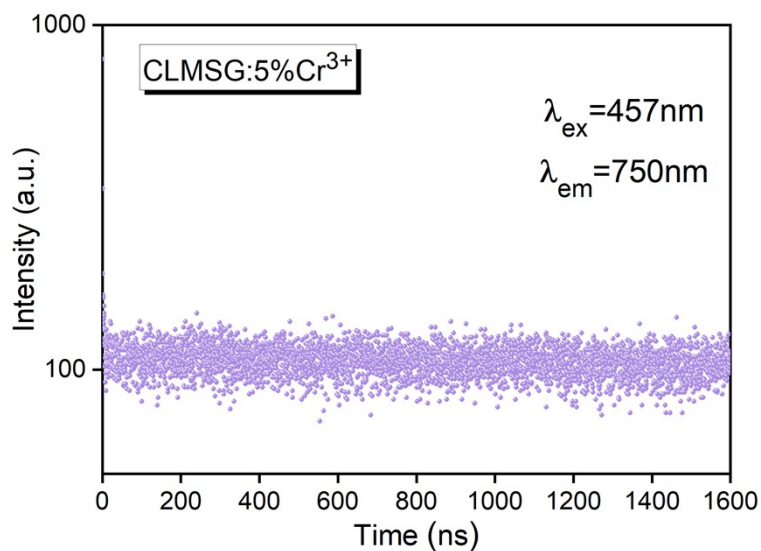

**Fig. S8** Decay curves of Cr<sup>3+</sup> ( $\lambda_{\text{ex}}=457\text{ nm}$ ,  $\lambda_{\text{em}}=750\text{ nm}$ ) of CLMSG:5%Cr<sup>3+</sup>. There is no decay in CLMSG:5%Cr<sup>3+</sup>.

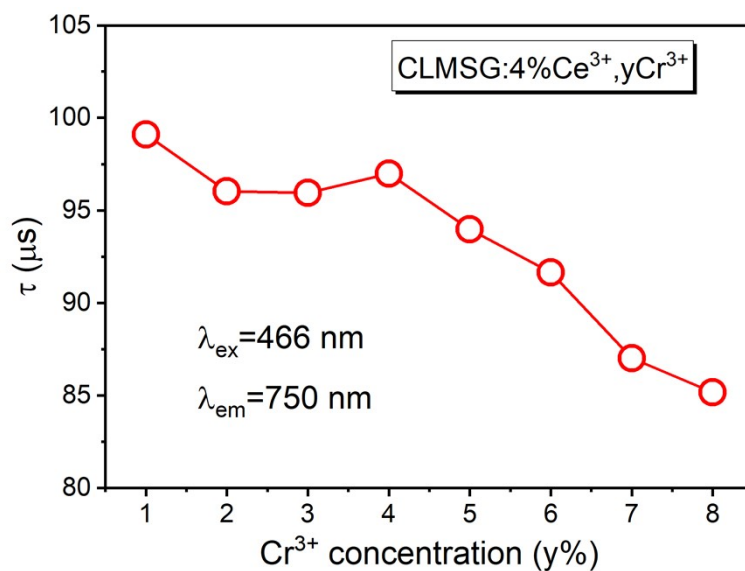

**Fig. S9** Fluorescent decay times of Cr<sup>3+</sup> monitored at 750 nm and excited at 466 nm in CLMSG:4%Ce<sup>3+</sup>, yCr<sup>3+</sup> ( $y=1\% - 8\%$ ) recorded at RT.  $\tau$  is the average lifetime, which gradually shortens from 99.1 to 85.2  $\mu\text{s}$  when Cr<sup>3+</sup> increases from 1% to 8%.

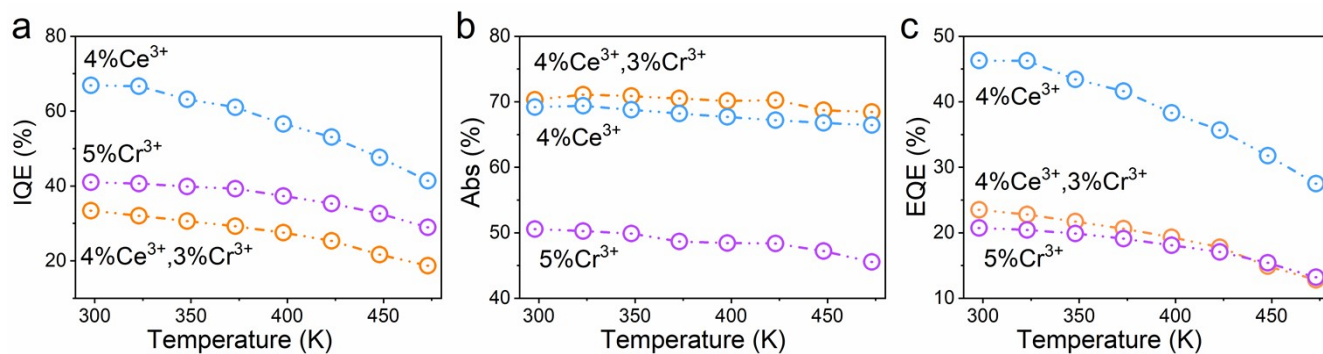

**Fig. S10** (a) IQE, (b) Abs and (c) EQE of CLMSG:5%Cr<sup>3+</sup>, CLMSG:4%Ce<sup>3+</sup> and CLMSG:4%Ce<sup>3+</sup>, 3%Cr<sup>3+</sup> dependent on temperatures from RT to 473 K.

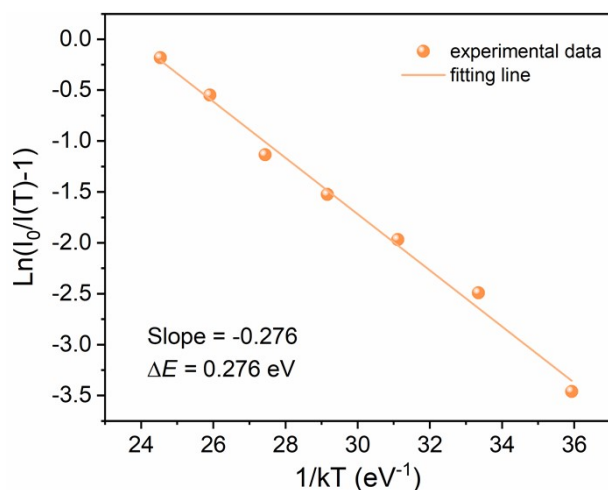

**Fig. S11** Relationship between  $1/kT$  and  $\ln[(I_0/I(T))-1]$  of CLMSG:4%Ce<sup>3+</sup>, 3%Cr<sup>3+</sup>.

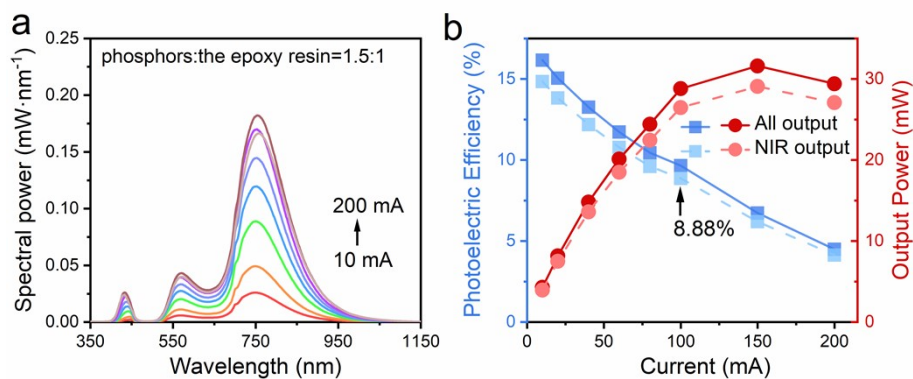

**Fig. S12** The EL spectra (a), output NIR power and photoelectrical conversion efficiency (b) of NIR pc-LED with phosphor-to-epoxy ratios of 1.5:1 dependent on driven current (10 - 200 mA).

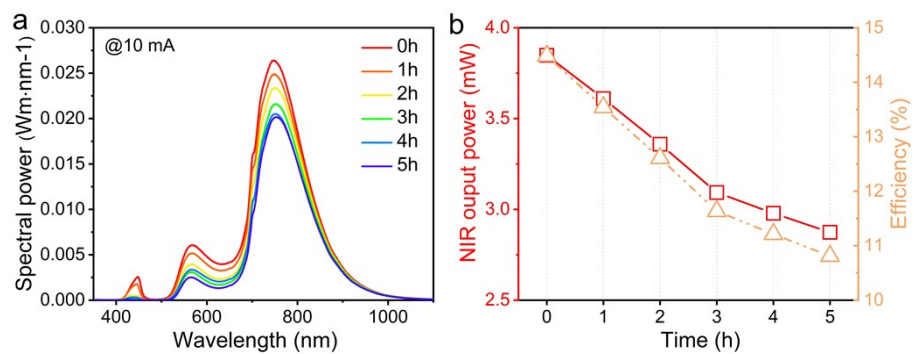

**Fig. S13** The EL spectra (a), NIR output power and photoelectrical conversion efficiency (b) of the NIR pc-LED device with a 1:1 phosphor-to-epoxy ratio, measured under continuous operation at 10 mA for 5 hours.

**Table S1** Atomic coordinates and site occupancy fraction (SOF) for CaLu<sub>2</sub>Mg<sub>2</sub>Si<sub>3</sub>O<sub>12</sub>:4%Ce<sup>3+</sup>,3%Cr<sup>3+</sup> phosphor.

| Atom | x      | y      | z      | SOF    | U <sub>iso</sub> |
|------|--------|--------|--------|--------|------------------|
| Ca1  | 0.1250 | 0.0000 | 0.2500 | 0.4000 | 0.0080           |
| Lu1  | 0.1250 | 0.0000 | 0.2500 | 0.5717 | 0.0083           |
| Mg2  | 0.1250 | 0.0000 | 0.2500 | 0.0150 | 0.0250           |
| Mg1  | 0.0000 | 0.0000 | 0.0000 | 0.9850 | 0.0120           |
| Cr1  | 0.0000 | 0.0000 | 0.0000 | 0.0150 | 0.0250           |
| Ce1  | 0.1250 | 0.0000 | 0.2500 | 0.0133 | 0.0250           |
| Si1  | 0.3750 | 0.0000 | 0.2500 | 1.0000 | 0.0100           |
| O1   | 0.0351 | 0.0538 | 0.6578 | 1.0000 | 0.0217           |

**Table S2** Rietveld refined crystallographic data for the CLMSG:5%Cr<sup>3+</sup>, CLMSG:4%Ce<sup>3+</sup>, and CLMSG:4%Ce<sup>3+</sup>, 3%Cr<sup>3+</sup>.

| Formula                             | CLMSG:5%Cr <sup>3+</sup> | CLMSG:4%Ce <sup>3+</sup> | CLMSG:4%Ce <sup>3+</sup> ,<br>3%Cr <sup>3+</sup> |
|-------------------------------------|--------------------------|--------------------------|--------------------------------------------------|
| Crystal system                      |                          | Cubic                    |                                                  |
| Space group                         |                          | Ia $\bar{3}$ d           |                                                  |
| $\alpha = \beta = \gamma(^{\circ})$ |                          | 90.000                   |                                                  |
| a = b = c(Å)                        | 11.9753                  | 11.9776                  | 11.9668                                          |
| Volume (Å <sup>3</sup> )            | 1717.367                 | 1718.35                  | 1713.68                                          |

**Table S3** Thermal stability of some reported NIR phosphors.

| NIR phosphor                                                                                                   | I <sub>150 °C</sub> (%) | ref       |
|----------------------------------------------------------------------------------------------------------------|-------------------------|-----------|
| Ca <sub>3</sub> Sc <sub>2</sub> Si <sub>3</sub> O <sub>12</sub> :0.06Ce <sup>3+</sup> ,0.03Cr <sup>3+</sup>    | 78                      | 1         |
| Ca <sub>2</sub> LuHf <sub>2</sub> Al <sub>3</sub> O <sub>12</sub> : 0.03Ce <sup>3+</sup> ,0.03Cr <sup>3+</sup> | 58                      | 2         |
| Ca <sub>3</sub> Sc <sub>2</sub> Ge <sub>3</sub> O <sub>12</sub> :0.14Ce <sup>3+</sup> ,0.16Cr <sup>3+</sup>    | 79@373K                 | 3         |
| Ca <sub>2</sub> YHf <sub>2</sub> Al <sub>3</sub> O <sub>12</sub> :0.04Ce <sup>3+</sup> , 0.02Cr <sup>3+</sup>  | 58                      | 4         |
| CaY <sub>2</sub> Mg <sub>2</sub> Ge <sub>3</sub> O <sub>12</sub> :0.02Ce <sup>3+</sup> ,0.02Cr <sup>3+</sup>   | 36.3                    | 5         |
| CaY <sub>2</sub> ScZrAl <sub>3</sub> O <sub>12</sub> :0.11Cr <sup>3+</sup> ,0.03Ce <sup>3+</sup>               | 60@373K                 | 6         |
| CaLu <sub>2</sub> Mg <sub>2</sub> Si <sub>3</sub> O <sub>12</sub> : 0.04Ce <sup>3+</sup> ,0.03Cr <sup>3+</sup> | 75.7                    | This work |

**Table S4** NIR pc-LED performance of CLMSG:Ce<sup>3+</sup>,Cr<sup>3+</sup> compared with the reported.

| NIR phosphor                                                                                                   | Photoelectronic conversion Efficiency@ drive current | Ref.      |
|----------------------------------------------------------------------------------------------------------------|------------------------------------------------------|-----------|
| Ga <sub>4</sub> GeO <sub>8</sub> :Cr <sup>3+</sup>                                                             | 8.0%@100 mA                                          | 7         |
| LiGaP <sub>2</sub> O <sub>7</sub> :Cr <sup>3+</sup>                                                            | ~9.2%@100 mA                                         | 8         |
| BaO(Al <sub>2</sub> O <sub>3</sub> ) <sub>4</sub> (ZnAl <sub>2</sub> O <sub>4</sub> ):Cr <sup>3+</sup>         | 7.98%@100 mA                                         | 9         |
| Ca <sub>3</sub> Sc <sub>2</sub> Ge <sub>3</sub> O <sub>12</sub> :0.14Ce <sup>3+</sup> ,0.16Cr <sup>3+</sup>    | 11.2%@100 mA                                         | 5         |
| CaY <sub>2</sub> ScZrAl <sub>3</sub> O <sub>12</sub> :0.11Cr <sup>3+</sup> ,0.01Ce <sup>3+</sup>               | 16.4%@100mA                                          | 6         |
| CaLu <sub>2</sub> Mg <sub>2</sub> Si <sub>3</sub> O <sub>12</sub> : 0.04Ce <sup>3+</sup> ,0.03Cr <sup>3+</sup> | 8.97%@100 mA                                         | This work |

## References

- 1 Y. Zhou, X. Li, T. Seto and Y. Wang, *ACS Sustainable Chem. Eng.*, 2021, **9**, 3145-156.
- 2 J. Wu, W. Zhuang, R. Liu, Y. Liu, T. Gao, C. Yan, M. Cao, J. Tian and X. Chen, *J. Rare Earths*, 2021, **39**, 269-276.
- 3 Y. Wang, M. Shang, Y. Sun, M. Deng, X. Xing, P. Dang and J. Lin, *J. Mater. Chem. C*, 2023, **11**, 9291-9299.
- 4 Q. Zhang, G. Li, P. Dang, D. Liu, D. Huang, H. Lia and J. Lin, *J. Mater. Chem. C*, 2021, **9**, 4815-4824.
- 5 Y. Li, Y. Jin, H. Gu, H. Gu, H. Xie, M. Yang, G. Xiang, L. Ma and X.-J. Wang, *Inorg. Chem.*, 2024, **63**, 23849-23857.
- 6 X. Xing, X. Wei, Y. Wang, L. Yu and M. Shang, *J. Mater. Chem. C*, 2025, **13**, 2745-2752.
- 7 L. Yao, Q. Shao, M. Shi, T. Shang, Y. Dong, C. Liang, J. He and J. Jiang, *Adv. Opt. Mater.*, 2021, **10**, 2102229.
- 8 C. Yuan, R. Li, Y. Liu, L. Zhang, J. Zhang, G. Leniec, P. Sun, Z. Liu, Z. Luo, R. Dong and J. Jiang, *Laser Photon. Rev.*, 2021, **15**, 2100227.
- 9 X. Zhang, L. Zhou and H. You, *Adv. Mater.*, 2025, **37**, 2419897.
